# Supplementary material
Source: PubMed Central journal article supplement (PMC7180049)
Supplement: NIHMS1576532-supplement-Vyas_et_al_Supplementary_figs.pdf [file NIHMS1576532-supplement-Vyas_et_al_Supplementary_figs.pdf]

**Figure S1: Calcitriol alters the binding of PU.1 and HDAC1 at VDRE and impairs total histone acetylation at *I/9* promoter**

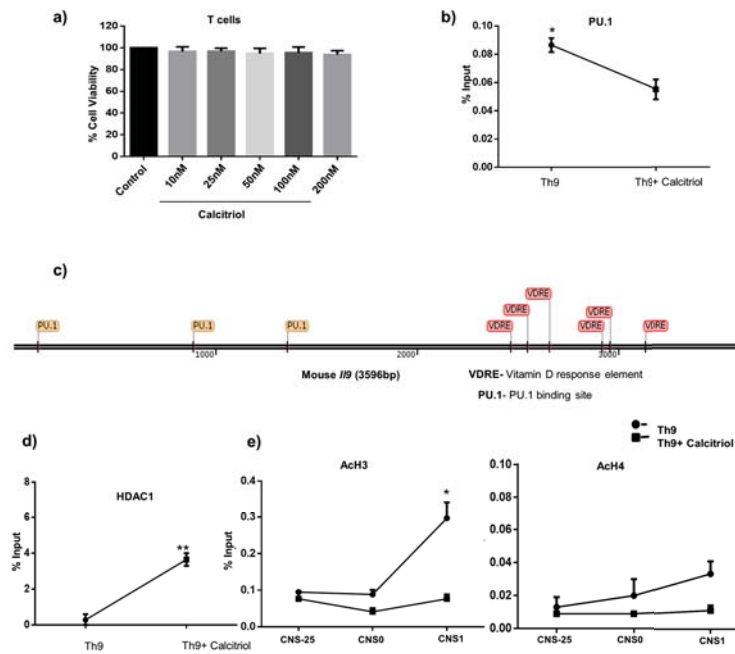

**Figure S1: Calcitriol alters the binding of PU.1 and HDAC1 at VDRE and impairs total histone acetylation at *I/9* promoter.** a) T cells were treated with different doses of calcitriol (10, 25, 50, 100 and 200 nM) and its impact on cell viability was determined by MTT assay b) Binding of PU.1 in the presence of calcitriol at putative VDRE described in Fig 1c was determined by ChIP. c) PU.1 binding sites and VDRE at *I/9* gene. d) HDAC1 binding in the presence of calcitriol at putative VDRE. e) Total acetylation of histones H3 and H4 was determined in the presence of calcitriol at the three CNS mentioned before using ChIP. Data represents mean  $\pm$  S.D of 3 independent experiments \* $p < 0.05$  and \*\* $p < 0.01$  when compared to Th9 cells.

**Figure S2: Calcitriol-mediated regulation of other cytokines secreted by Th9 cells**

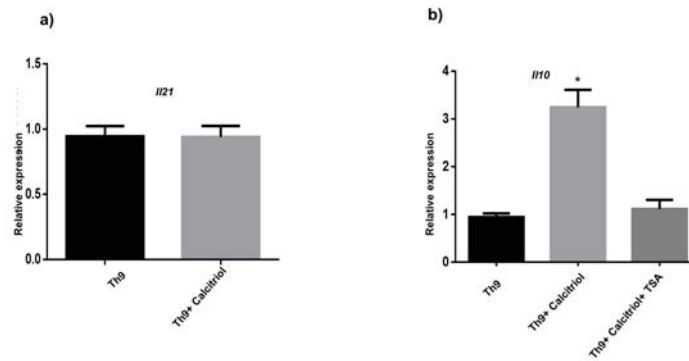

**Figure S2: Calcitriol-mediated regulation of other cytokines secreted by Th9 cells.** a) Th9 cells were treated with calcitriol and the expression of *IL21* was determined by q RT-PCR. b) Th9 cells were treated with calcitriol and TSA and the expression of *IL10* was assessed by q RT-PCR.

**Table S1:** List of primers for q RT-PCR and conserved non-coding sequences used in ChIP

| <b>Gene/CNS</b>   | <b>Primer sequence (5'→3')</b> |
|-------------------|--------------------------------|
| mIL-9F            | CATCAGTGTCTCTCCGTCCCAACTGATG   |
| mIL-9R            | GATTTCTGTGTGG CATTGGTCAG       |
| mIL-4F            | ACGAGGTCACAGGAGAAGGGA          |
| mIL-4R            | AGCCCTACAGACGAGCTCACTC         |
| mIL-17aF          | ACCCTGGACTCTCCACCGCAA          |
| mIL-17aR          | GGCTGCCTGGCGGACAATCG           |
| mIL-10F           | ATAACTGCACCCACTTCCCA           |
| mIL-10R           | GGGCATCACTTCTACCAGGT           |
| mPU.1F            | GGGAGAGCCATAGCGACCAT           |
| mPU.1R            | TAGGAGACCTGGTGGCCA AGA         |
| mIRF4F            | GCCCAACAAGCTAGAAAG             |
| mIRF4R            | TCTCTGAGGGTCTGGAAACT           |
| mBatfF            | GAAGAATCGCATCGCTGC             |
| mBatfR            | GTTCTGTTTCTCCAGGTCC            |
| mGata3F           | CGGGTCGGCCAGGCAAGATG           |
| mGata3R           | AGGGGAACCTCCCAGCAGGC           |
| mROR $\gamma$ tF  | GGAGCTCTGCCAGAATGACC           |
| mROR $\gamma$ tR  | CAAGGCTCGAAACAGCTCCAC          |
| mFoxp3F           | GGCCCTTCTCCAGGACAGA            |
| mFoxp3R           | GCTGATCATGGCTGGGTTGT           |
| mVDRF             | CTCCTCGATGCCCACCACAAGACCTACG   |
| mVDRR             | GTGGGGCAGCATGGAGAGCGGAGACAG    |
| m $\beta$ -ActinF | GATCTGGCACCACACCTTCT           |
| m $\beta$ -ActinR | ACCAGAGGCATACAGGGACA           |
| CNS0 F            | GAGCTGAACGCAGGCCAAGAACGA       |
| CNS0 R            | CTTGGAAGTAGTTATCTCTCCACTG      |
| CNS1 F            | CAGTCTACCAGCATCTTCCAGTCTAGC    |
| CNS1 R            | GTGGGCACTGGGTATCAGTTTGATGTC    |
| CNS-25 F          | ATGTCATGAGGCTTGTCTGC           |
| CNS-25R           | ACTCCTAATCTTCAAGCCCCT          |

**Table S2:** List of primers used in generating various mutants

| <b>Name</b> | <b>Primer sequence<br/>(5'→3')</b>                   |
|-------------|------------------------------------------------------|
| Primer 1    | ATCAGGGGATCCTCACTATAGGGCGAATTGGG                     |
| Primer 2    | TTACGCTGCACCTCCTCATCCACATTCCGGTCAAAGTC               |
| Primer 3    | GATGAGGAGGTGCAGCGTAA                                 |
| Primer 4    | ATGACCGAATTCCAAGCTATGCATCCAACGC                      |
| Primer 5    | ATAACCGAATTCATGGAGGCAATGGCAGCC                       |
| Primer 6    | ATGACCGAATTCTCACTGGAAGGAGAGGGAACGG                   |
| Primer 7    | ATGACCGAATTCTCAAGCTCTGGAGACATCAGTGATG                |
| Primer 8    | ATGACCGAATTCTCAGGTAAGACTGGTTGGAGCG                   |
| Primer 9    | ACTATTTGAAGAGCATCTTTTCTGATTAATGGTATTTCTGGCATAAGACAG  |
| Primer 10   | CTGTCTTATGCCAGGAAATACCATTAATCAGAAAAGATGCTCTTCAAATAGT |
| Primer 11   | CTGAGGCTCCAATAGCCAGATTAACCCCAATGAGTGAAAG             |
| Primer 12   | CTTTCATCATTGGGGTTTTAATCTGGCTATTGGAGCCTCAG            |
